# Supplementary material for: NF-κB/RelA-PKM2 mediates inhibition of glycolysis by fenofibrate in glioblastoma cells
Source: PubMed Central journal article supplement (PMC4694890; doi:10.18632/oncotarget.4444), 2015-06-30
Supplement: oncotarget-06-26119-s001.pdf [file oncotarget-06-26119-s001.pdf]

SUPPLEMENTARY FIGURE

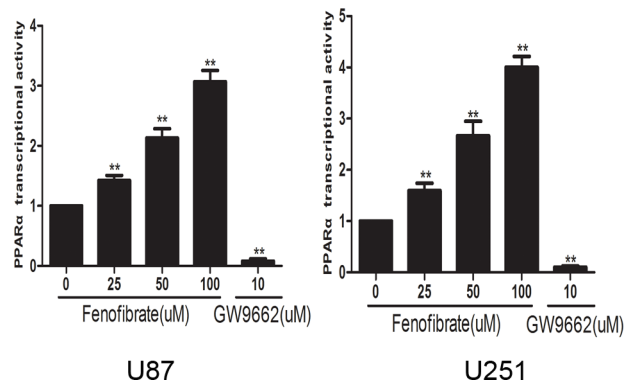

Supplementary Figure S1: FF increases PPARα in a dose-dependent manner and GW9662 (10 μM) decreases transcriptional activity of PPARα.
